# Supplementary material for: Determination of dissolved oxygen based on photoinduced electron transfer from quantum dots to methyl viologen
Source: Royal Society of Chemistry journal article supplement (doi:10.1039/c0ay00201a), 2010-01-01
Supplement: c0ay00201a.pdf [file c0ay00201a.pdf]

---

## Supplementary Material (ESI) for Analytical Methods

---

### Supplementary data for “Determination of dissolved oxygen based on photoinduced electron transfer from quantum dots to methyl viologen”

Cong Kong, Lixia Qin, Jiaofang Liu, Xinhua Zhong, Linyong Zhu\* and Yi-Tao Long\*

*Key Laboratory for Advanced Materials & Department of Chemistry, East China University of Science and Technology, 130 Meilong Road, Shanghai, P.R. CHINA. E-mail: [yitong@ecust.edu.cn](mailto:yitong@ecust.edu.cn) (Yi-Tao Long); E-mail: [linyongzhu@ecust.edu.cn](mailto:linyongzhu@ecust.edu.cn) (Lin-Yong Zhu) Tel: +086 21 642 50032; +086 21 642 52339.*

#### Color change of CdS QDs-GSH-MV system

In the presence of electron donor GSH, the light irradiation of CdS QDs could induce  $MV^{2+}$  dication to be reduced to the corresponding deep blue radical cation.

The diffusion of oxygen in the sample encourages the re-oxidation of the radical cations back to the dicationic form (light yellow).

#### Processes of oxygen sensitive CdS QDs-GSH-MV system under light illumination

A solution of CdS QDs (0.59  $\mu$ M),  $MV^{2+}$  (9.62 mM) and GSH (1.54 mM) in 0.2 M PBS (pH = 7.5).

**1. Color change from original light yellow to dark blue under first light illumination.** (see the video file “1 Color first.mpg”)

**2. Diffusion of oxygen induce color to change back to its original light yellow.** (see the video file “2 Colorless first.mpg”)

**3. Color change to dark blue again under light illumination.** (see the video file “3 Color second.mpg”)

**4. Diffusion of oxygen induce color to change back to its original light yellow again.** (see the video file “4 Colorless second.mpg”)
